# Supplementary material
Source: PubMed Central journal article supplement (PMC2805530)
Supplement: f-66-00029-sup1.pdf [file f-66-00029-sup1.pdf]

**SUPPLEMENTARY MATERIAL**

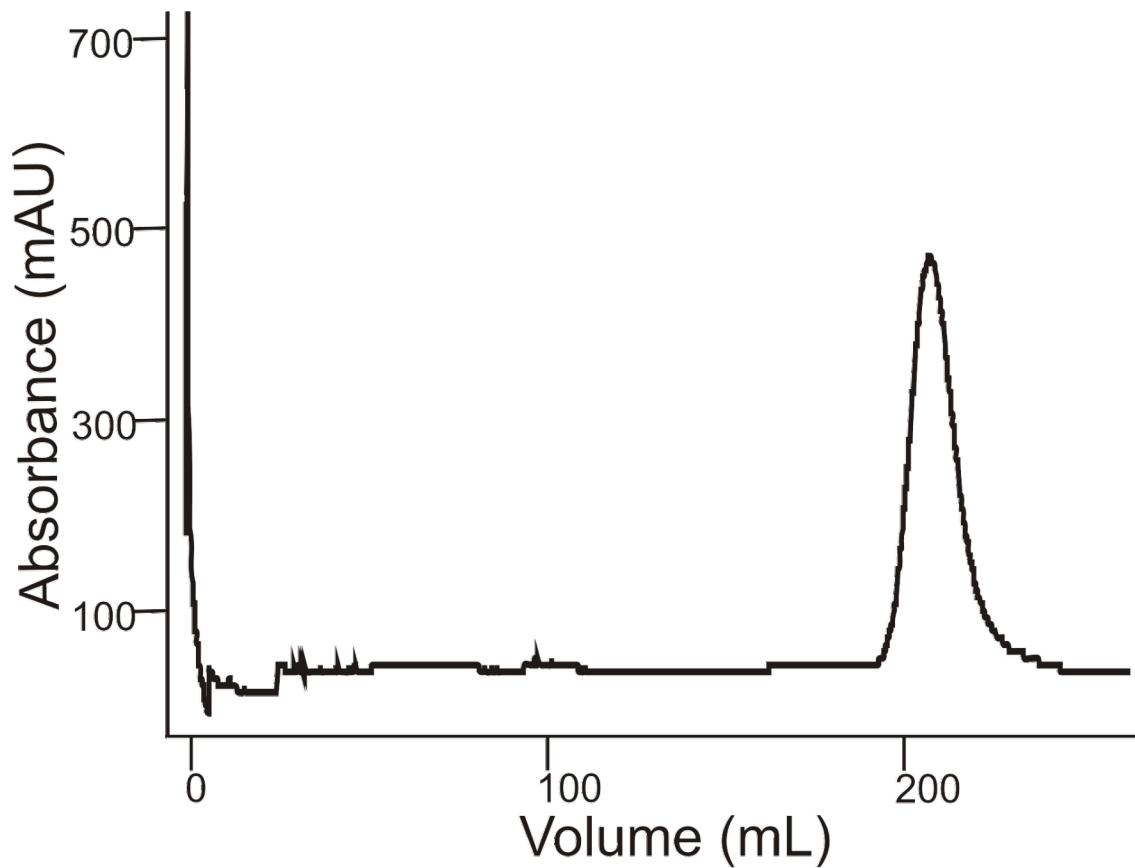

**Supplementary Figure 1**

Recombinant refolded protein containing residues 71-187 of CLEC5A (encoded by plasmid pOC579) was purified by size-exclusion gel-filtration chromatography in 20 mM Tris pH 8.0, 150 mM NaCl with a Superdex 75 26/60 column on an ÄKTA Purifier (GE Healthcare, Uppsala, Sweden). UV absorbance was measured at 280 nm. The protein eluted at a volume corresponding to that expected for a monomer.
